# Supplementary material for: The Transcriptional Landscape of Marek’s Disease Virus in Primary Chicken B Cells Reveals Novel Splice Variants and Genes
Source: MDPI journal article supplement (doi:10.3390/v11030264), 2019-03-16
Supplement: s1 [file s1]

## Supplementary Material for:

# **The Transcriptional Landscape of Marek's Disease Virus in Primary Chicken B Cells Reveals Novel Splice Variants and Genes.**

by L. Bertzbach and F. Pfaff *et al.*

## **Supplementary Methods**

### **Method S1: Generation and *In Vitro* Characterization of RB1BΔMetICP0**

To generate an ICP0 knockout mutant and a virus with a tagged ICP0, we mutated the only start codon ATG to a double stop codon (TTGTTG) in the RB-1B strain (RB1B\_ΔMetICP0) and created a virus harboring an HA-tagged ICP0 (RB1B\_ICP0-HA) respectively, using two-step Red-mediated mutagenesis. Final clones were confirmed by multiple restriction fragment length polymorphism (RFLP) analyses, PCR, and Sanger sequencing of the target region. The viruses were reconstituted and propagated on CEC for up to six passages, and infected cells were stored in liquid nitrogen until further use. All virus stocks were titrated on fresh CEC. The RB1B\_ΔMetICP0 replication was analyzed using plaque size assays. One million CECs were infected with 100 PFU and fixed at 6 days post-infection. Fixed cells were stained with an anti-MDV chicken serum, and plaques were visualized using an anti-chicken Alexa Fluor 488 secondary antibody. Images of 50 randomly selected plaques were taken, and plaque diameters were determined using the Image J Software (NIH). For western blot analysis, cells were harvested and lysed in radioimmunoprecipitation assay buffer (RIPA). Lysates were mixed with SDS sample loading buffer and denatured for 5 min at 95°C prior to SDS-PAGE separation. Proteins were transferred onto a polyvinylidene difluoride (PVDF) membrane (Carl Roth; Karlsruhe, Germany) using the BioRad wet blot system (BioRad Laboratories; München, Germany) for 1 h at 9 V. Membranes were blocked and incubated for 16 hours at 4°C with an HA-Tag (6E2) mouse monoclonal antibody (1:1000). Proteins were visualized using a horseradish peroxidase-conjugated anti-mouse secondary antibody and membranes were stained with a western blot detection reagent (enhanced chemiluminescence, ECL-prime, GE Healthcare; Chicago, IL, USA). The signal was recorded with the Chemi-Smart 5100 detection system (Pepqlab; Erlangen, Germany).

## Supplementary Figures

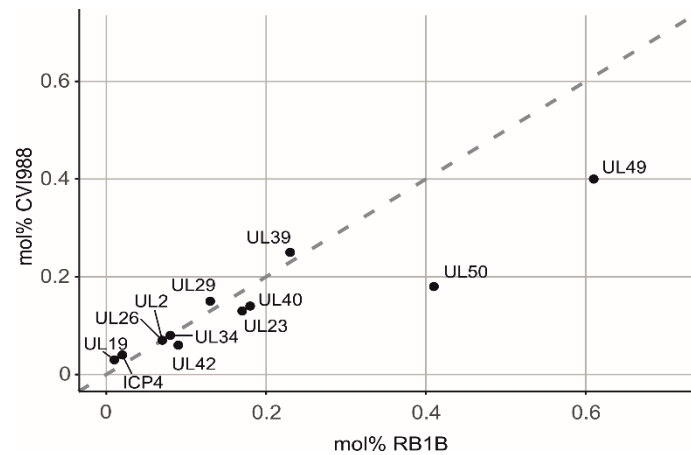

**Figure S1:** Protein concentration (mol%) scatterplot comparing levels of detected viral proteins in RB1B and CVI988 infected primary chicken B cells. The dashed lines indicate equal distribution.

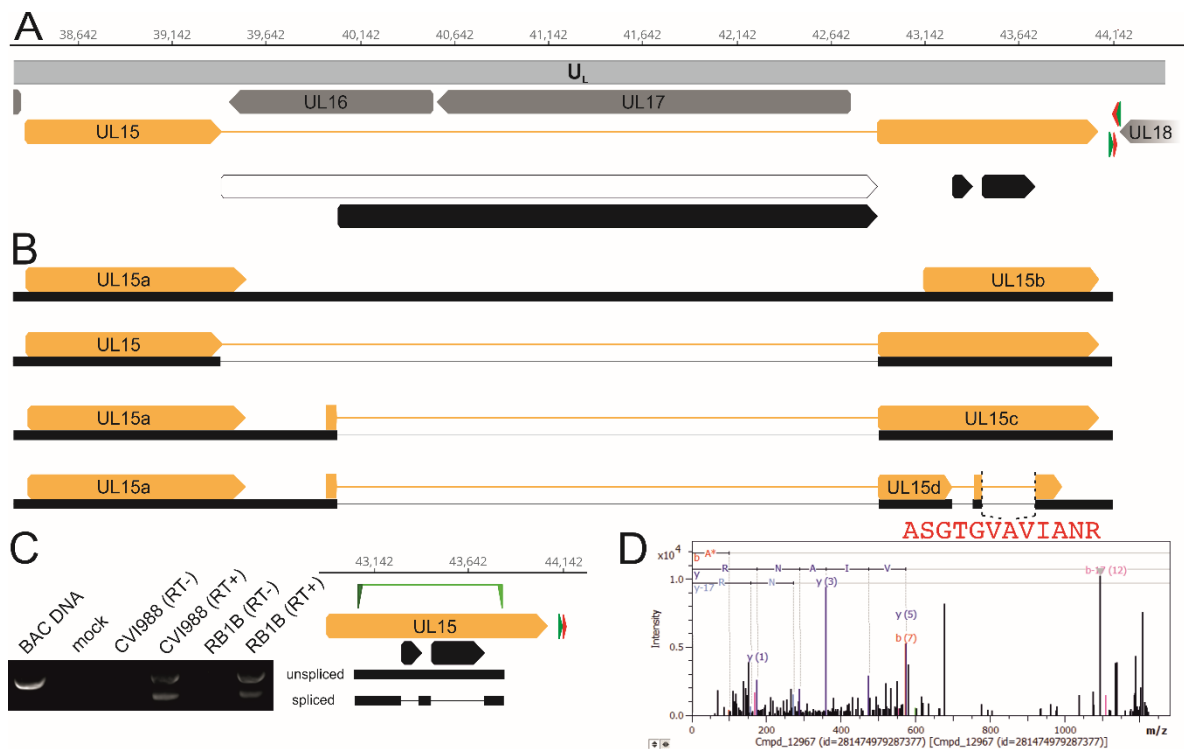

**Figure S2: Detected splice variants of UL15.** (A) UL15 is currently annotated as spliced gene (orange arrows) in MDV Refseq NC002229 (positions) with an intron (white arrow) that spans the CDS of UL16 and UL17 (grey arrows). In addition to this canonical splice event, we detected at least three more possible introns (black arrows). Detected poly(A) cleavage cluster and the correlating motif are highlighted as red and green arrows, respectively. (B) The black bars indicate possible UL15 transcripts, while the orange arrows indicate possible open reading frames. Splicing results in at least five possible proteins: UL15, UL15a, UL15b, UL15c and UL15d. (C) RT-PCR was performed to validate the splicing event that results in UL15d. PCR products (black bars) were derived using forward/reverse primers (green markers) to amplify the respective intron-flanking regions for UL15d. The representative gel images illustrate the simultaneous presence of spliced and unspliced RNA of RB1B and CVI988. (D) The exon-exon junction within UL15d matched a peptide (red) found by MALDI-TOF/TOF. Only y- and b- series are annotated.

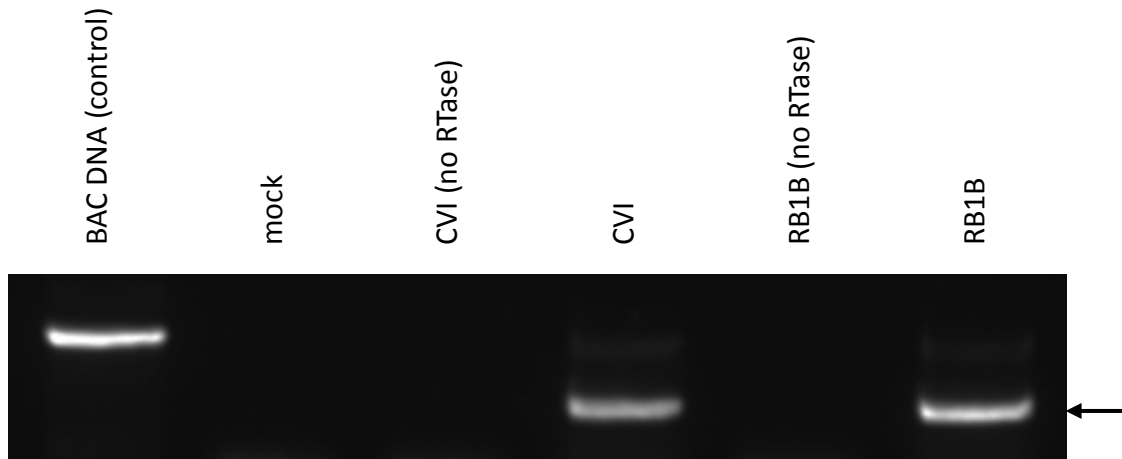

**Figure S3: RT-PCR confirmation of splicing events in pp38.** PCR products were derived using forward/reverse primers to amplify the respective intron-flanking regions for pp38. The representative gel images illustrate the results of RT-PCR analysis. The black arrow indicates the spliced form.

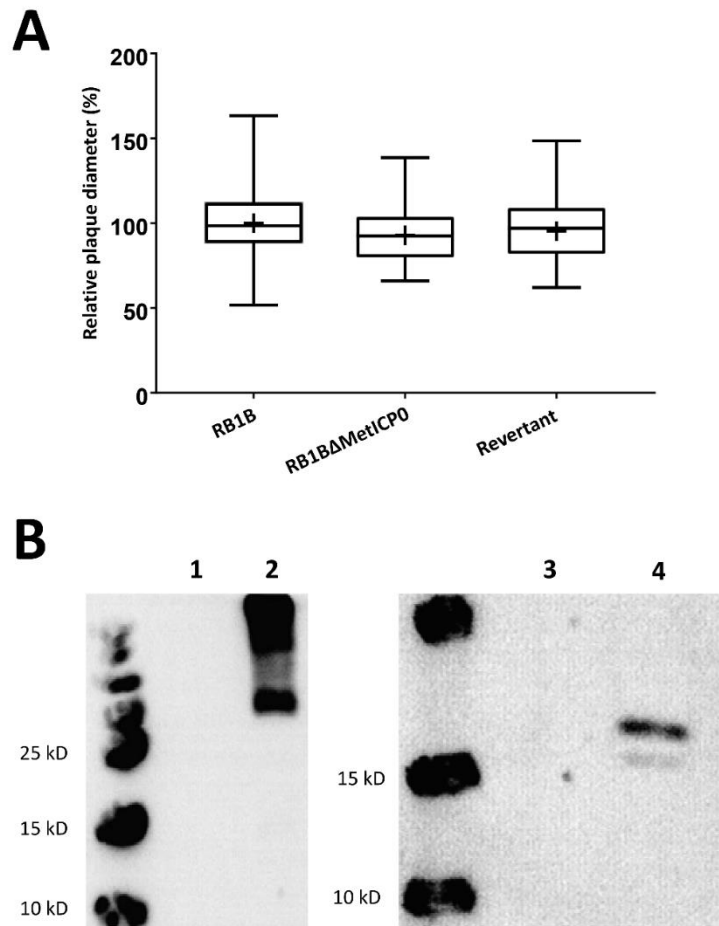

**Figure S4: Plaques size assays and western blot analysis for the ICP0 mutant RB1BΔMetICP0.** *In vitro* characterization of the RB1BΔMetICP0 mutant confirmed that it is dispensable for virus growth and cell-to-cell spread. **(A)** Relative plaque diameters of 50 randomly selected plaques per virus are shown as box plots with 95% confidence intervals and SD. **(B)** Western blot analysis detecting an RB1B virus mutant harboring an HA-tagged ICP0 (RB1B\_ICP0-HA) (1), an HA tag positive control (2), and RB1B\_ICP0-HA (3) compared to a pViro-plasmid-expressed, HA-tagged ICP0 (4).

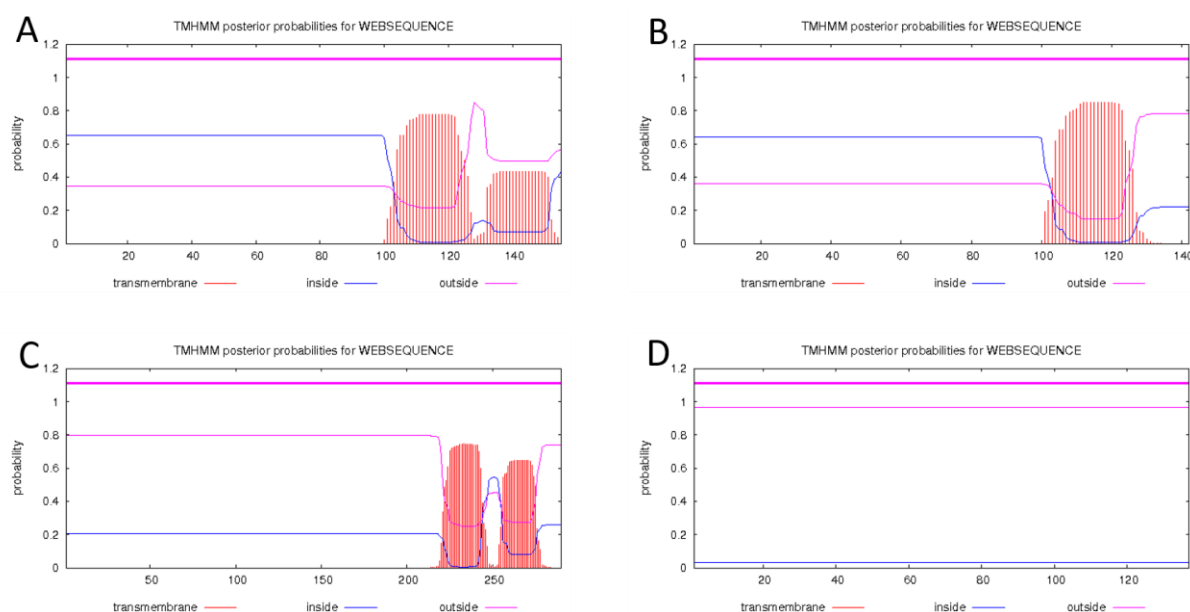

**Figure S5: Transmembrane helix prediction for spliced and unspliced pp24 (A and B) and pp38 (C and D).** Protein with two transmembrane helices (unspliced forms, A and C) and with only one helix (pp24 spliced, B) and no transmembrane helix (pp38 spliced, D). Prediction was done using the TMHMM Server v. 2.0.

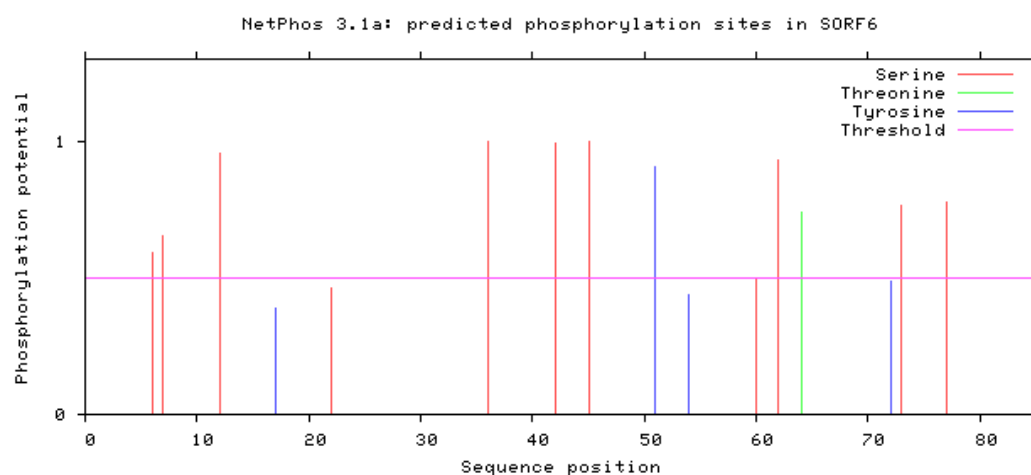

**Figure S6: Prediction of serine, threonine or tyrosine phosphorylation sites in the hypothetical MDV protein SORF6 encoded on the U<sub>s</sub> segment.** Prediction was done using the NetPhos 3.1 Server.

## Supplementary Tables

**Table S1:** Marek's disease virus (MDV) proteins detected by mass spectrometry

| ORF           | Gene  | Protein Description                                    |
|---------------|-------|--------------------------------------------------------|
| MDV014        | UL2   | Uracil-DNA glycosylase                                 |
| MDV031        | UL19  | Major capsid protein                                   |
| MDV036        | UL23  | Thymidine kinase                                       |
| MDV038        | UL26  | Capsid scaffolding protein                             |
| MDV042        | UL29  | Major ssDNA binding protein                            |
| MDV047        | UL34  | Nuclear egress protein 2                               |
| MDV052        | UL39  | Ribonucleoside-diphosphate reductase large subunit     |
| MDV053        | UL40  | Ribonucleoside-diphosphate reductase small subunit     |
| MDV055        | UL42  | DNA polymerase processivity subunit                    |
| MDV062        | UL49  | Tegument protein VP22                                  |
| MDV063        | UL50  | Deoxyuridine 5'-triphosphate nucleotidohydrolase (DUT) |
| MDV084/MDV100 | SORF1 | Major viral transcription factor ICP4                  |

**Table S2:** Primers used in this study

| Gene                     | Direction | Sequence             |
|--------------------------|-----------|----------------------|
| MDV010 (vLIP)            | For       | GATCCATGGAAGTGCATTGG |
|                          | Rev       | TGGGATTCCCATGAAAGGTA |
| MDV012 (ORF012)          | For       | CTTACTCTCGCGCCTGGTAA |
|                          | Rev       | GGGGATCAGGCTCCTTAGAA |
| MDV057 (gC)              | For       | TGCATACCCACGTCAATCTG |
|                          | Rev       | TTTCTATGGCGATCGATGGT |
| MDV027 (UL15)            | For       | AAGGATCGGCTGATGATCTT |
|                          | Rev       | CCGAATTAAACTGGGCGATA |
| MDV073 (pp38)            | For       | AATTCGCTTAATCTCCGCCT |
|                          | Rev       | GGAATTCGAAGCAGAACACG |
| novel gene in US (SORF6) | For       | TGGTTATCGATTTCGGAA   |
|                          | Rev       | TTCGACGAATTAAGCTCGAT |

**Table S3:** Summary of RNA-seq read mapping

| Library               | Virus  | Reads      | Average read length | Uniquely mapped reads | Uniquely mapped reads % |
|-----------------------|--------|------------|---------------------|-----------------------|-------------------------|
| MDV-CVI988_1_lib02435 | CVI988 | 15.585.559 | 141                 | 2.020.992             | 12.97                   |
| MDV-CVI988_2_lib02436 | CVI988 | 15.662.671 | 135                 | 1.076.218             | 6.87                    |
| MDV-CVI988_3_lib02437 | CVI988 | 16.987.196 | 136                 | 1.977.331             | 11.64                   |
| MDV-RB1B_1_lib02432   | RB1B   | 17.798.972 | 133                 | 2.095.271             | 11.77                   |
| MDV-RB1B_2_lib02433   | RB1B   | 16.582.704 | 111                 | 1.760.125             | 10.61                   |

**Table S4:** Introns identified from RNA-seq data.

| Intron start | Intron stop | Orientation | Read number | Frequency in<br>CVI988 | Frequency in<br>RB1B | Intron length |
|--------------|-------------|-------------|-------------|------------------------|----------------------|---------------|
| 14218        | 14477       | +           | 472         | 0.028                  | 0.010                | 260           |
| 14631        | 14700       | +           | 1062        | 0.029                  | 0.072                | 70            |
| 17540        | 17621       | +           | 7734        | 0.945                  | 0.883                | 82            |
| 23570        | 25010       | +           | 387         | 0.938                  | 0.814                | 1441          |
| 37541        | 39215       | +           | 67          | 1.000                  | 0.000                | 1675          |
| 39404        | 42884       | +           | 33          | 0.149                  | 0.000                | 3481          |
| 40023        | 42884       | +           | 146         | 0.000                  | 0.658                | 2862          |
| 42651        | 42884       | +           | 42          | 0.977                  | 0.000                | 234           |
| 43282        | 43389       | +           | 409         | 0.022                  | 0.598                | 108           |
| 43444        | 43723       | +           | 646         | 0.071                  | 0.422                | 280           |
| 43444        | 48493       | +           | 35          | 0.033                  | 0.000                | 5050          |
| 44447        | 46036       | +           | 115         | 0.504                  | 0.000                | 1590          |
| 46711        | 48559       | +           | 61          | 0.310                  | 0.000                | 1849          |
| 47645        | 48559       | +           | 23          | 0.404                  | 0.000                | 915           |
| 47909        | 48559       | +           | 20          | 0.452                  | 1.000                | 651           |
| 48026        | 48551       | -           | 170         | 0.039                  | 0.311                | 526           |
| 48633        | 48904       | +           | 264         | 0.632                  | 0.031                | 272           |
| 49048        | 50816       | +           | 276         | 0.412                  | 0.000                | 1769          |
| 56222        | 57133       | +           | 237         | 0.514                  | 0.000                | 912           |
| 65264        | 65913       | +           | 82          | 0.000                  | 0.953                | 650           |
| 65591        | 65913       | +           | 11          | 0.268                  | 0.000                | 323           |
| 95701        | 102920      | -           | 51          | 0.221                  | 0.000                | 7220          |
| 103244       | 103388      | +           | 2375        | 0.224                  | 0.082                | 145           |
| 103285       | 103388      | +           | 8900        | 0.820                  | 0.628                | 104           |
| 103542       | 104450      | -           | 16          | 0.615                  | 0.000                | 909           |
| 111959       | 112359      | -           | 368         | 0.447                  | 0.000                | 401           |
| 123201       | 123695      | -           | 23          | 0.043                  | 0.023                | 495           |
| 123310       | 123803      | -           | 48          | 0.096                  | 0.000                | 494           |
| 125947       | 126222      | +           | 24          | 0.889                  | 0.000                | 276           |
| 126269       | 127407      | -           | 20          | 0.002                  | 0.000                | 1139          |
| 126300       | 126729      | +           | 24          | 0.960                  | 0.000                | 430           |
| 126904       | 127407      | -           | 3695        | 0.214                  | 0.172                | 504           |
| 126904       | 127437      | -           | 181         | 0.006                  | 0.011                | 534           |
| 127855       | 128016      | -           | 25341       | 0.573                  | 0.660                | 162           |
| 127917       | 128016      | -           | 4070        | 0.102                  | 0.080                | 100           |
| 127939       | 128016      | -           | 2843        | 0.073                  | 0.052                | 78            |
| 128559       | 129719      | -           | 88          | 0.044                  | 0.000                | 1161          |
| 128572       | 130900      | +           | 5725        | 0.046                  | 0.269                | 2329          |
| 128764       | 130900      | +           | 4670        | 0.031                  | 0.036                | 2137          |
| 129809       | 130865      | -           | 1608        | 0.833                  | 0.557                | 1057          |
| 129853       | 130865      | -           | 130         | 0.075                  | 0.000                | 1013          |
| 129866       | 130900      | +           | 3475        | 0.022                  | 0.021                | 1035          |
| 130958       | 131423      | -           | 2235        | 0.564                  | 0.290                | 466           |
| 131633       | 131762      | -           | 784         | 0.586                  | 0.000                | 130           |
| 131683       | 131762      | -           | 177         | 0.132                  | 0.000                | 80            |
| 132126       | 133050      | -           | 26          | 0.121                  | 0.579                | 925           |
| 132975       | 133061      | +           | 59          | 0.967                  | 0.000                | 87            |
| 135044       | 135780      | -           | 282         | 0.000                  | 0.310                | 737           |
| 135161       | 135780      | -           | 414         | 0.720                  | 0.040                | 620           |
| 135943       | 136062      | -           | 287         | 0.571                  | 0.531                | 120           |
| 138129       | 138303      | +           | 23824       | 0.947                  | 0.916                | 175           |
| 138440       | 138537      | +           | 69973       | 0.913                  | 0.941                | 98            |
| 138440       | 138521      | +           | 1732        | 0.027                  | 0.014                | 82            |
| 143491       | 152141      | -           | 86          | 0.025                  | 0.025                | 8651          |
| 144052       | 144604      | +           | 118         | 0.000                  | 0.423                | 553           |
| 144052       | 144376      | +           | 77          | 0.182                  | 0.254                | 325           |
| 144052       | 144180      | +           | 47          | 0.000                  | 0.168                | 129           |
| 144494       | 144604      | +           | 497         | 0.000                  | 0.823                | 111           |

|        |        |   |      |       |       |      |
|--------|--------|---|------|-------|-------|------|
| 144724 | 144996 | + | 48   | 0.960 | 0.000 | 273  |
| 145239 | 147059 | + | 37   | 0.213 | 0.011 | 1821 |
| 147123 | 147209 | + | 401  | 0.316 | 0.360 | 87   |
| 147608 | 147678 | + | 1074 | 0.609 | 0.467 | 71   |
| 147608 | 147819 | + | 486  | 0.000 | 0.254 | 212  |
| 147787 | 148156 | + | 1744 | 0.832 | 0.819 | 370  |
| 148246 | 148330 | + | 692  | 0.477 | 0.624 | 85   |
| 148407 | 150128 | + | 457  | 0.138 | 0.221 | 1722 |
| 148407 | 149466 | + | 206  | 0.000 | 0.122 | 1060 |
| 150744 | 152141 | - | 442  | 0.135 | 0.098 | 1398 |
| 150945 | 152141 | - | 1684 | 0.443 | 0.644 | 1197 |
| 152280 | 152624 | + | 24   | 0.012 | 0.000 | 345  |
| 164391 | 164465 | - | 1824 | 0.706 | 0.434 | 75   |

**Table S5:** Poly(A) cleavage sites, polyadenylation signals and polycistronic transcripts identified in MDV transcriptomes.

| Position of poly(A) cleavage site | Orientation | Read coverage | Position of associated motif | Motif sequence | Distance | Associated transcripts           |
|-----------------------------------|-------------|---------------|------------------------------|----------------|----------|----------------------------------|
| 15163-15169                       | +           | 21            | 15141-15146                  | ATTAAA         | 16       | MDV008                           |
| 15285-15292                       | +           | 176           | 15268-15273                  | AATAAA         | 11       | MDV008                           |
| 16898-16910                       | +           | 219           | 16887-16892                  | AATAAA         | 5        | MDV010                           |
| 16901-16901                       | -           | 7             | 16919-16924                  | AATAAA         | 17       | unknown                          |
| 19058-19068                       | +           | 377           | 19041-19046                  | AATAAA         | 11       | MDV012                           |
| 19668-19668                       | -           | 8             | n.d.                         |                |          | unknown                          |
| 21620-21620                       | -           | 4             | 21642-21647                  | AATAAA         | 21       | MDV016, MDV017                   |
| 21620-21632                       | +           | 109           | 21603-21608                  | AATAAA         | 11       | MDV013, MDV014, MDV015, MDV015.5 |
| 21726-21732                       | -           | 8             | 21748-21753                  | AATAAA         | 15       | MDV016, MDV017                   |
| 21726-21738                       | +           | 44            | 21709-21714                  | AATAAA         | 11       | MDV013, MDV014, MDV015, MDV015.5 |
| 28246-28257                       | -           | 5             | 28272-28277                  | AATAAA         | 14       | MDV020                           |
| 28256-28266                       | +           | 38            | 28237-28242                  | AATAAA         | 13       | MDV018, MDV019                   |
| 30453-30454                       | -           | 8             | 30471-30476                  | AATAAA         | 16       | MDV021                           |
| 31641-31641                       | -           | 11            | n.d.                         |                |          | unknown                          |
| 32127-32127                       | -           | 13            | 32147-32152                  | AATAGA         | 19       | unknown                          |
| 34530-34534                       | -           | 47            | 34550-34555                  | AATAAA         | 15       | MDV023, MDV024, MDV025           |
| 34532-34535                       | +           | 53            | 34512-34517                  | AATAAA         | 14       | MDV022                           |
| 36883-36889                       | -           | 36            | 36913-36918                  | ATTAAA         | 23       | MDV026, MDV028, MDV029           |
| 37074-37074                       | -           | 4             | n.d.                         |                |          | MDV026, MDV028, MDV029           |
| 37264-37267                       | -           | 8             | 37282-37287                  | AATAAA         | 14       | MDV026, MDV028, MDV029           |
| 44138-44162                       | -           | 274           | 44168-44173                  | AATAAA         | 5        | MDV030, MDV031, MDV032           |
| 44144-44150                       | +           | 136           | 44123-44128                  | AATAAA         | 15       | MDV027                           |
| 52458-52461                       | -           | 11            | 52479-52484                  | AATAAA         | 17       | MDV034, MDV036                   |
| 52460-52465                       | +           | 13            | 52441-52446                  | AATAAA         | 13       | MDV033                           |
| 59083-59085                       | +           | 7             | 59064-59069                  | AATAAA         | 13       | MDV035, MDV037                   |
| 61008-61011                       | -           | 208           | 61025-61030                  | AATAAA         | 13       | MDV040, MDV041                   |
| 61009-61009                       | +           | 188           | 60991-60996                  | AATAAA         | 12       | MDV038, MDV039                   |
| 64872-64872                       | -           | 3             | 64889-64894                  | AATAAA         | 16       | unknown                          |
| 66217-66231                       | -           | 97            | 66243-66248                  | AATAAA         | 11       | MDV042                           |
| 69388-69392                       | -           | 55            | n.d.                         |                |          | unknown                          |
| 73618-73621                       | -           | 86            | 73636-73641                  | AATAAA         | 14       | MDV044, MDV046                   |
| 73842-73862                       | +           | 101           | 73822-73827                  | AATAAA         | 14       | MDV043                           |
| 78413-78419                       | +           | 20            | 78394-78399                  | AATAAA         | 13       | MDV045, MDV047, MDV048           |
| 78421-78422                       | -           | 9             | 78438-78443                  | AATAAA         | 15       | MDV049                           |
| 79493-79493                       | +           | 5             | 79469-79474                  | ATTAAA         | 18       | unknown                          |

|               |   |      |               |        |    |                                        |
|---------------|---|------|---------------|--------|----|----------------------------------------|
| 85728-85732   | - | 6    | 85749-85754   | AATAAA | 16 | MDV050                                 |
| 97360-97362   | - | 10   | 97379-97384   | ATTAAA | 16 | MDV054                                 |
| 97438-97442   | + | 50   | 97421-97426   | AATAAA | 11 | MDV051, MDV052, MDV053                 |
| 100955-100955 | + | 6    | 100920-100925 | AAAAAA | 29 | MDV055                                 |
| 102019-102024 | + | 167  | 102001-102006 | AATAAA | 12 | MDV056                                 |
| 103709-103722 | + | 7    | 103695-103700 | ATTAAA | 8  | MDV057                                 |
| 105182-105190 | - | 78   | 105201-105206 | AATAAA | 10 | MDV059, MDV060                         |
| 105185-105185 | + | 11   | 105175-105180 | AATAAA | 4  | MDV058                                 |
| 109707-109710 | - | 167  | 109725-109730 | AATAAA | 14 | MDV061, MDV062, MDV064                 |
| 113737-113758 | - | 78   | n.d.          |        |    | MDV065                                 |
| 113742-113747 | + | 288  | 113723-113728 | AATAAA | 13 | MDV063                                 |
| 120437-120464 | + | 139  | 120422-120427 | AATAAA | 9  | MDV066, MDV067, MDV068                 |
| 120451-120459 | - | 46   | 120472-120477 | AATAAA | 12 | MDV069                                 |
| 121971-121985 | + | 124  | 121957-121962 | AATAAA | 8  | MDV070                                 |
| 121975-121980 | - | 6    | 121999-122004 | ATTAAA | 18 | MDV071, MDV072                         |
| 122824-122824 | + | 29   | n.d.          |        |    | unknown                                |
| 126400-126411 | - | 487  | 126421-126426 | AATAAA | 9  | MDV072.5, MDV073                       |
| 128589-128619 | + | 48   | 128574-128579 | AATAAA | 9  | RLORF12                                |
| 128620-128637 | + | 334  | 128601-128606 | AATAAA | 13 | RLORF12                                |
| 128844-128863 | + | 59   | n.d.          |        |    | ORF3                                   |
| 128901-128931 | + | 72   | n.d.          |        |    | ORF3                                   |
| 128934-128957 | + | 167  | 128907-128912 | ATTAAA | 21 | ORF3                                   |
| 128975-128992 | + | 7    | n.d.          |        |    | ORF3                                   |
| 129287-129304 | + | 83   | 129276-129281 | ATTAAA | 5  | unknown                                |
| 129500-129503 | + | 7    | n.d.          |        |    | unknown                                |
| 129633-129633 | - | 8    | 129655-129660 | AATAAA | 21 | RLORF11                                |
| 130233-130238 | + | 1725 | 130217-130222 | AATAAA | 10 | unknown                                |
| 132160-132173 | + | 298  | 132143-132148 | ATTAAA | 11 | 14 kDa lytic phase protein, RLORF9     |
| 136325-136329 | - | 11   | n.d.          |        |    | unknown                                |
| 137292-137296 | + | 9    | 137271-137276 | ATTAAA | 15 | L1                                     |
| 138580-138584 | - | 6    | 138599-138604 | AATAAA | 14 | unknown hypothetical protein           |
| 138782-138788 | + | 16   | 138762-138767 | ATTAAA | 14 | MDV078                                 |
| 139043-139049 | + | 28   | 139025-139030 | ATTAAA | 12 | unknown hypothetical protein           |
| 142968-142977 | - | 18   | 142994-142999 | AATAAA | 16 | MDV082, MDV084                         |
| 143058-143068 | - | 27   | 143083-143088 | AATAAA | 14 | MDV082, MDV084                         |
| 145732-145732 | - | 3    | n.d.          |        |    | unknown                                |
| 148941-148941 | - | 3    | n.d.          |        |    | unknown                                |
| 153357-153360 | - | 6    | 153384-153389 | AATAAA | 23 | unknown                                |
| 155661-155669 | - | 3    | 155686-155691 | AATAAA | 16 | MDV090, MDV091                         |
| 155696-155706 | + | 80   | 155678-155683 | AATAAA | 12 | MDV087, MDV088, MDV089                 |
| 163958-163964 | - | 7    | n.d.          |        |    | unknown                                |
| 163959-163968 | + | 189  | 163941-163946 | AATAAA | 12 | MDV092, MDV093, MDV094, MDV095, MDV096 |
| 164076-164096 | - | 97   | 164115-164120 | AATAAA | 18 | SORF6, MDV097                          |

n.d.: No canonical motif detected.
